# Supplementary material for: Social Relationships, Age and the Use of Preventive Health Services: Findings from the German Ageing Survey
Source: PubMed Central journal article supplement (PMC6862648; doi:10.3390/ijerph16214272), 2019-11-04
Supplement: ijerph-16-04272-s001.pdf [file ijerph-16-04272-s001.pdf]

**Logistic regression models for flu vaccination (Model 1.1) and cancer screening (Model 2.1) with interaction terms between informational support and age (German Ageing Survey, 2014).**

| <i>Predictors</i>                                                             | Seasonal flu vaccination (Model 1.1) |               | Cancer screening (Model 2.1) |               |
|-------------------------------------------------------------------------------|--------------------------------------|---------------|------------------------------|---------------|
|                                                                               | <i>Odds Ratios</i>                   | <i>95% CI</i> | <i>Odds Ratios</i>           | <i>95% CI</i> |
| <b>(Intercept)</b>                                                            | 0.01                                 | 0.00-0.04     | 0.00                         | 0.00-0.00     |
| <b>Gender (Ref. male): female</b>                                             | 1.03                                 | 0.93-1.15     | 2.37                         | 2.14-2.63     |
| <b>Age in years</b>                                                           | 1.06                                 | 1.04-1.08     | 1.38                         | 1.17-1.63     |
| <b>Informational support (Ref. no): yes</b>                                   | 1.28                                 | 0.38-4.50     | 5.77                         | 0.03-1598.26  |
| <b>ISCED-1: low</b>                                                           | 0.89                                 | 0.75-1.06     | 1.00                         | 1.00-1.00     |
| <b>ISCED-3: high</b>                                                          | 1.03                                 | 0.93-1.15     | 0.87                         | 0.73-1.04     |
| <b>Number of physical diseases</b>                                            | 1.08                                 | 1.04-1.11     | 1.13                         | 1.02-1.26     |
| <b>Very good</b>                                                              | 0.50                                 | 0.40-0.62     | 1.05                         | 1.01-1.08     |
| <b>Good</b>                                                                   | 0.73                                 | 0.65-0.82     | 0.78                         | 0.64-0.94     |
| <b>Bad</b>                                                                    | 1.07                                 | 0.89-1.29     | 1.06                         | 0.94-1.19     |
| <b>Very bad</b>                                                               | 1.69                                 | 1.20-2.40     | 0.77                         | 0.64-0.93     |
| <b>Partner (Ref. no): yes</b>                                                 | 1.20                                 | 1.07-1.34     | 0.77                         | 0.55-1.08     |
| <b>Social network size (number of important persons with regular contact)</b> | 0.99                                 | 0.97-1.01     | 1.57                         | 1.41-1.75     |
| <b>Age*informational support</b>                                              | 1.00                                 | 0.98-1.02     | 1.02                         | 1.00-1.04     |
| <b>Age in years (cubic term)</b>                                              |                                      |               | 0.98                         | 0.82-1.15     |
| <b>Age in years (cubic term)*informational support</b>                        |                                      |               | 1.00                         | 1.00-1.00     |
| <b>Observations</b>                                                           | 7,588                                |               | 7,515                        |               |

**Logistic regression models for flu vaccination (Model 1.2) and cancer screening (Model 2.2) with interaction terms between having a partner and age (German Ageing Survey, 2014).**

| <i>Predictors</i>                                                             | Seasonal flu vaccination (Model 1.2) |               | Cancer screening (Model 2.2) |               |
|-------------------------------------------------------------------------------|--------------------------------------|---------------|------------------------------|---------------|
|                                                                               | <i>Odds Ratios</i>                   | <i>95% CI</i> | <i>Odds Ratios</i>           | <i>95% CI</i> |
| <b>(Intercept)</b>                                                            | 0.01                                 | 0.01-0.02     | 0.00                         | 0.00-0.00     |
| <b>Gender (Ref. male): female</b>                                             | 1.03                                 | 0.93-1.14     | 2.44                         | 2.19-2.70     |
| <b>Age in years</b>                                                           | 1.06                                 | 1.05-1.07     | 1.31                         | 1.23-1.39     |
| <b>Informational support (Ref. no): yes</b>                                   | 1.42                                 | 0.78-2.58     | 0.52                         | 0.04-7.02     |
| <b>ISCED-1: low</b>                                                           | 0.89                                 | 0.74-1.06     | 1.00                         | 1.00-1.00     |
| <b>ISCED-3: high</b>                                                          | 1.03                                 | 0.93-1.15     | 0.87                         | 0.73-1.05     |
| <b>Very good</b>                                                              | 1.08                                 | 1.04-1.11     | 1.14                         | 1.02-1.26     |
| <b>Good</b>                                                                   | 0.50                                 | 0.40-0.62     | 1.05                         | 1.02-1.08     |
| <b>Bad</b>                                                                    | 0.73                                 | 0.65-0.82     | 0.78                         | 0.64-0.95     |
| <b>Very bad</b>                                                               | 1.07                                 | 0.89-1.29     | 1.07                         | 0.95-1.20     |
| <b>Partner (Ref. no): yes</b>                                                 | 1.70                                 | 1.20-2.40     | 0.77                         | 0.64-0.93     |
| <b>Social network size (number of important persons with regular contact)</b> | 1.38                                 | 1.13-1.70     | 0.76                         | 0.54-1.08     |
| <b>Age*partner</b>                                                            | 0.99                                 | 0.97-1.01     | 1.41                         | 1.16-1.71     |

|                                          |  |       |      |           |
|------------------------------------------|--|-------|------|-----------|
| <b>Age in years (cubic term)</b>         |  |       | 1.02 | 1.00-1.04 |
| <b>Age in years (cubic term)*partner</b> |  |       | 1.02 | 0.94-1.11 |
| <b>Observations</b>                      |  | 7,588 |      | 7,515     |

**Logistic regression models for flu vaccination (Model 1.3) and cancer screening (Model 2.3) with interaction terms between social network size and age (German Ageing Survey, 2014).**

| <i>Predictors</i>                                                             | Seasonal flu vaccination<br>(Model 1.3) |               | Cancer screening<br>(Model 2.3) |               |
|-------------------------------------------------------------------------------|-----------------------------------------|---------------|---------------------------------|---------------|
|                                                                               | <i>Odds Ratios</i>                      | <i>95% CI</i> | <i>Odds Ratios</i>              | <i>95% CI</i> |
| <b>(Intercept)</b>                                                            | 0.01                                    | 0.01-0.02     | 0.00                            | 0.00-0.04     |
| <b>Gender (Ref. male): female</b>                                             | 1.03                                    | 0.93-1.15     | 2.38                            | 2.15-2.64     |
| <b>Age in years</b>                                                           | 1.06                                    | 1.05-1.07     | 1.20                            | 1.10-1.31     |
| <b>Informational support (Ref. no): yes</b>                                   | 1.00                                    | 0.90-1.11     | 0.51                            | 0.31-0.82     |
| <b>ISCED-1: low</b>                                                           | 0.89                                    | 0.74-1.06     | 1.00                            | 1.00-1.00     |
| <b>ISCED-3: high</b>                                                          | 1.03                                    | 0.93-1.15     | 0.87                            | 0.73-1.04     |
| <b>Very good</b>                                                              | 1.08                                    | 1.04-1.11     | 1.14                            | 1.02-1.27     |
| <b>Good</b>                                                                   | 0.50                                    | 0.40-0.62     | 1.05                            | 1.01-1.08     |
| <b>Bad</b>                                                                    | 0.73                                    | 0.65-0.82     | 0.79                            | 0.65-0.95     |
| <b>Very bad</b>                                                               | 1.07                                    | 0.89-1.29     | 1.07                            | 0.95-1.20     |
| <b>Partner (Ref. no): yes</b>                                                 | 1.69                                    | 1.20-2.40     | 0.78                            | 0.65-0.94     |
| <b>Social network size (number of important persons with regular contact)</b> | 1.38                                    | 1.13-1.70     | 0.77                            | 0.55-1.09     |
| <b>Age*network size</b>                                                       | 1.20                                    | 1.07-1.34     | 1.40                            | 1.15-1.69     |
| <b>Age in years (cubic term)</b>                                              |                                         |               | 1.58                            | 1.41-1.76     |
| <b>Age in years (cubic term)*network size</b>                                 |                                         |               | 1.02                            | 1.01-1.04     |
| <b>Observations</b>                                                           |                                         | 7,588         |                                 | 7,515         |
